# Supplementary material for: A Computational Approach to the Functional Screening of Genomes
Source: PLOS journal article supplement (doi:10.1371/journal.pcbi.0030174), 2007-09-21
Supplement: S1 (10.1371/journal.pcbi.0030174.s001) [file journal.pcbi.0030174.s001]

## Glycolysis, pyruvate-to-acetate pathway, NADH oxidation, ATP synthesis

| Genes included in the <i>Minimal gene set</i> | Encoded protein<br>*                                    | Genes included in ViCe |
|-----------------------------------------------|---------------------------------------------------------|------------------------|
| mg050                                         | § fructose-1,6-bisphosphate (4.1.2.13)                  | mg050                  |
| mg058                                         | § phosphoglucosomerase (5.3.1.9)                        | mg058                  |
| mg066                                         | § 6-phosphofructo-1-kinase                              | mg066                  |
| mg112                                         | § pyruvate kinase (2.7.1.40)                            | mg112                  |
|                                               | § pyruvate dehydrogenase complex                        | mg396                  |
| mg272                                         | § pyruvate dehydrogenase complex                        | mg272                  |
| mg273                                         | § pyruvate dehydrogenase complex                        | mg273                  |
| mg274                                         | § pyruvate dehydrogenase complex                        | mg274                  |
| mg300                                         | § phosphoglycerate kinase (2.7.2.3)                     | mg300                  |
| mg301                                         | § glyceraldehyde-3-phosphate dehydrogenase (1.2.1.12)   | mg301                  |
| mg406                                         | @ hypothetical protein                                  |                        |
| mg407                                         | § enolase (4.2.1.11)                                    | mg407                  |
| mg430                                         | § phosphoglycerate mutase                               | mg430                  |
| mg431                                         | triose phosphate isomerase (5.3.1.1)                    | mg431                  |
| mg299                                         | § phosphate acetyl transferase (2.3.1.8)                | mg299                  |
| mg357                                         | § acetate kinase (2.7.2.1)                              | mg357                  |
| mg275                                         | § NADH dehydrogenase [transmembrane complex]            | mg275                  |
| mg398-405                                     | § ATP synthase complex [transmembrane complex]          | mg398-405              |
| mg053                                         | phosphomannomutase (5.4.2.8)                            | mg053                  |
| mg063                                         | ° fructose-1-phosphate kinase (2.7.1.56)                | mg063                  |
| mg119                                         | @ Simple Sugar Transport System [ATP-binding protein]   | mg119                  |
| mg120                                         | @ Simple Sugar Transport System [permease protein]      | mg120                  |
| mg187                                         | § multiple sugar transport system [ATP-binding protein] | mg187                  |
|                                               | § PTS System: PTSg [glucose-specific component]         | mg069                  |
|                                               | § PTS System: phosphotranferase (2.7.3.9)               | mg429                  |

## Nucleotides metabolism

| Genes included in the <i>Minimal Gene Set</i> | Encoded protein                                         | Genes included in ViCe |
|-----------------------------------------------|---------------------------------------------------------|------------------------|
| mg006                                         | § Thymidilate kinase<br>(2.7.4.9)                       | mg006                  |
| mg030                                         | § uracil phosphoribosyl transferase                     | mg030                  |
| mg042-045                                     | @ polyamine transport system<br>(3.1.2.15)              | mg042-045              |
| mg049                                         | § purine nucleoside phosphorylase<br>(2.4.2.1)          |                        |
| mg052                                         | § cytidine deaminase<br>(3.5.4.5)                       |                        |
| mg102                                         | § thioredoxine reductase<br>(1.8.1.9)                   | mg102                  |
| mg107                                         | § guanylate kinase<br>(2.7.4.8)                         | mg107                  |
| mg124                                         | § thioredoxin                                           | mg124                  |
| mg125                                         | @ hypothetical hydrolase                                | mg125                  |
| mg127                                         | ° arsenate reductase (ArsC)                             |                        |
| mg171                                         | § adenylate kinase                                      | mg171                  |
| mg227                                         | § thymidilate synthase                                  | mg227                  |
| mg229                                         | § ribonucleoside diphosphate<br>reductase<br>(1.17.4.1) | mg229                  |
| mg231                                         | § ribonucleoside diphosphate<br>reductase<br>(1.17.4.1) | mg231                  |
| mg268                                         | ° hypothetical protein                                  | mg268                  |
| mg296                                         | § adenine phosphoribosyl<br>transferase<br>(2.4.2.7)    | mg296                  |
| mg330                                         | § CMP kinase<br>(2.7.4.14)                              | mg330                  |
| mg382                                         | § uridine kinase<br>(2.7.1.48)                          |                        |
| mg434                                         | putative uridylate kinase                               | mg434                  |
| mg438                                         | ° fructose-1-phosphate kinase<br>(2.7.4.-)              | mg438                  |
|                                               | § dihydrofolate reductase                               | mg228                  |
|                                               | nucleoside diphosphate kinase<br>(2.7.4.6)              | hi_0876                |

## Aminoacids metabolism

| Genes included in the <i>Minimal Gene Set</i> | Encoded protein                 | Genes included in ViCe |
|-----------------------------------------------|---------------------------------|------------------------|
| mg077-080                                     | aminoacid uptake complex        | mg077-080              |
| mg180                                         | putative ATP-binding<br>protein |                        |
| mg336                                         | cysteine desulfurase<br>2.8.1.7 |                        |

|       |                                               |  |
|-------|-----------------------------------------------|--|
| mg391 | putative leucine aminopeptidase<br>(3.4.11.1) |  |
|-------|-----------------------------------------------|--|

### Lipids and glycerol metabolism

| Genes included in the <i>Minimal Gene Set</i> | Encoded protein                                       | Genes included in ViCe |
|-----------------------------------------------|-------------------------------------------------------|------------------------|
| mg033                                         | § Glycerol uptake facilitator protein                 | mg033                  |
| mg038                                         | § glycerol kinase                                     | mg038                  |
| mg114                                         | § PGP synthase                                        | mg114                  |
| mg212                                         | § glycerol-3-phosphate acyl transferase<br>(2.3.1.51) | mg212                  |
| mg287                                         | § Acil Carrier Protein                                | mg287                  |
| mg293                                         | § phosphodiersterase                                  | mg293                  |
| mg333                                         | @ ACP phosphodiersterase                              | mg333                  |
| mg437                                         | CDP diglyceride synthase<br>(2.7.7.41)                | mg437                  |
|                                               | § glycerol-3-phosphate acyl transferase<br>(2.3.1.15) | hi0748                 |

### Coenzymes metabolism

| Genes included in the <i>Minimal Gene Set</i> | Encoded protein                                                | Genes included in ViCe |
|-----------------------------------------------|----------------------------------------------------------------|------------------------|
| mg013                                         | § methylenetetrahydrofolate dehydrogenase<br>(1.5.1.5 3.5.4.9) |                        |
| mg047                                         | § S-adenosylmethionine synthetase<br>2.5.1.6                   | mg047                  |
| mg145                                         | § riboflavine kinase                                           | mg145                  |
| mg245                                         | ° hypothetical protein                                         |                        |
| mg270                                         | § lipoate peotein ligase                                       | mg270                  |
| mg383                                         | § NAD <sup>+</sup> synthase<br>(6.5.3.1)                       | mg383                  |
| mg394                                         | § serine hydroxymethyltransferase<br>(2.1.2.1)                 | mg394                  |

### Inorganic ions uptake

| Genes included in the <i>Minimal Gene Set</i> | Encoded protein           | Genes included in ViCe |
|-----------------------------------------------|---------------------------|------------------------|
| mg065                                         | § ABC:ATP carriers family | mg065                  |

|       |                                                                 |       |
|-------|-----------------------------------------------------------------|-------|
|       | dehydrogenase<br>(1.5.1.5 3.5.4.9)                              |       |
| mg071 | @ hypothetical protein                                          | mg071 |
| mg322 | @ hypothetical protein                                          | mg322 |
| mg410 | § Phosphate transfert system:<br>permeasre pstA<br>[ABC family] | mg410 |
| mg411 | § Phosphate transfert system:<br>permeasre pstA<br>[ABC family] | mg411 |

### Legenda:

§ Protein with functional role described in cyt

@ protein having a functional role considered uncertain or putative both in cyt and in KEGG.

° protein having a functional role considered uncertain or putative in cyt. In this case the annotation in cyt was corrected by us on the base of recent informations.

\* numbers in parenthesys correspond to “Enzyme Commission numbers” of IUPAC-IUMB
